# Supplementary material
Source: PubMed Central journal article supplement (PMC7684559)

# Figure S1

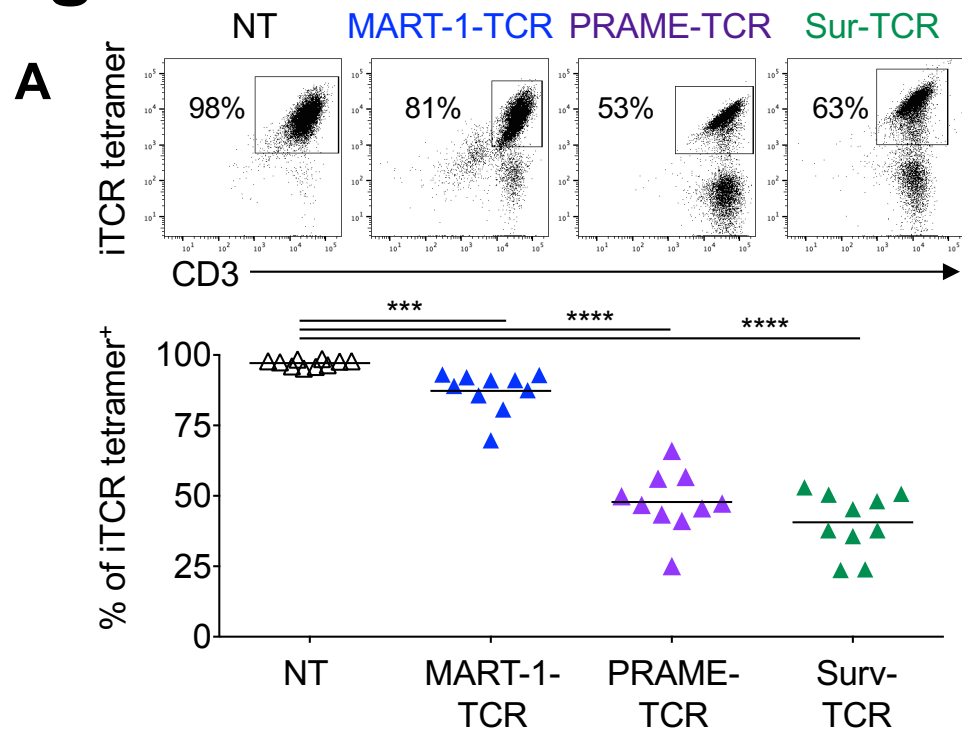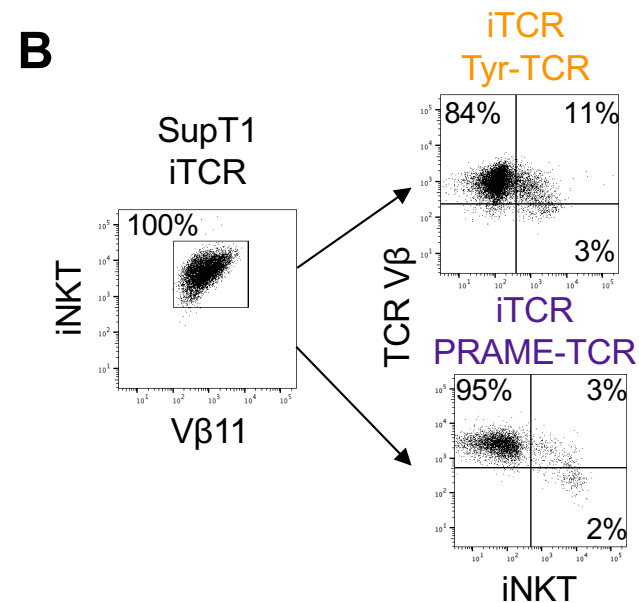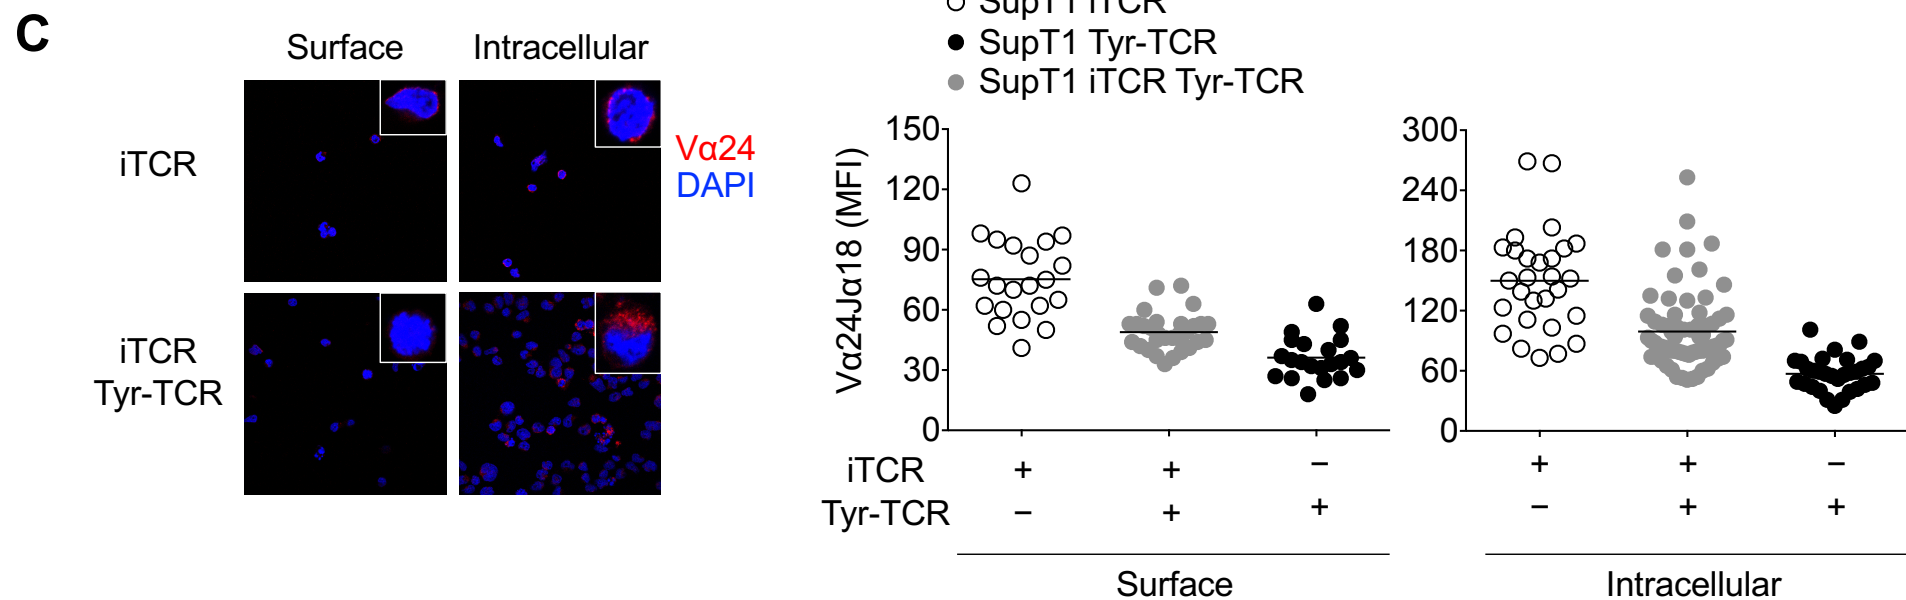

# Figure S2

**A**

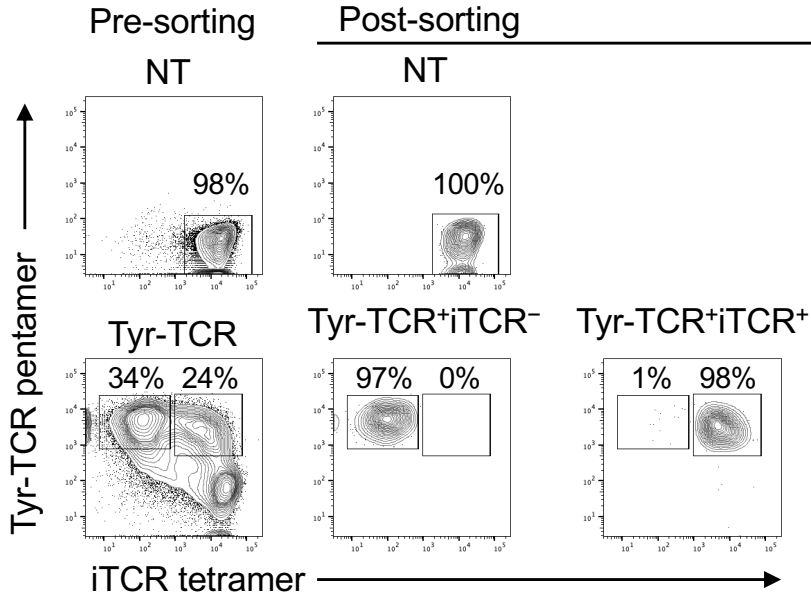

**B**

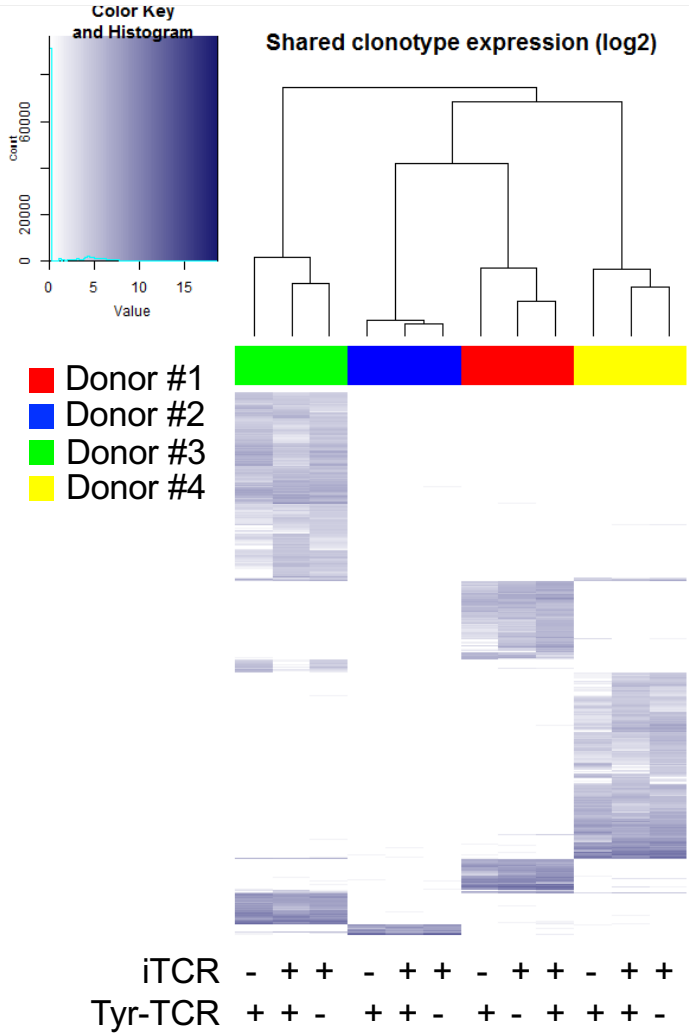

# Figure S3

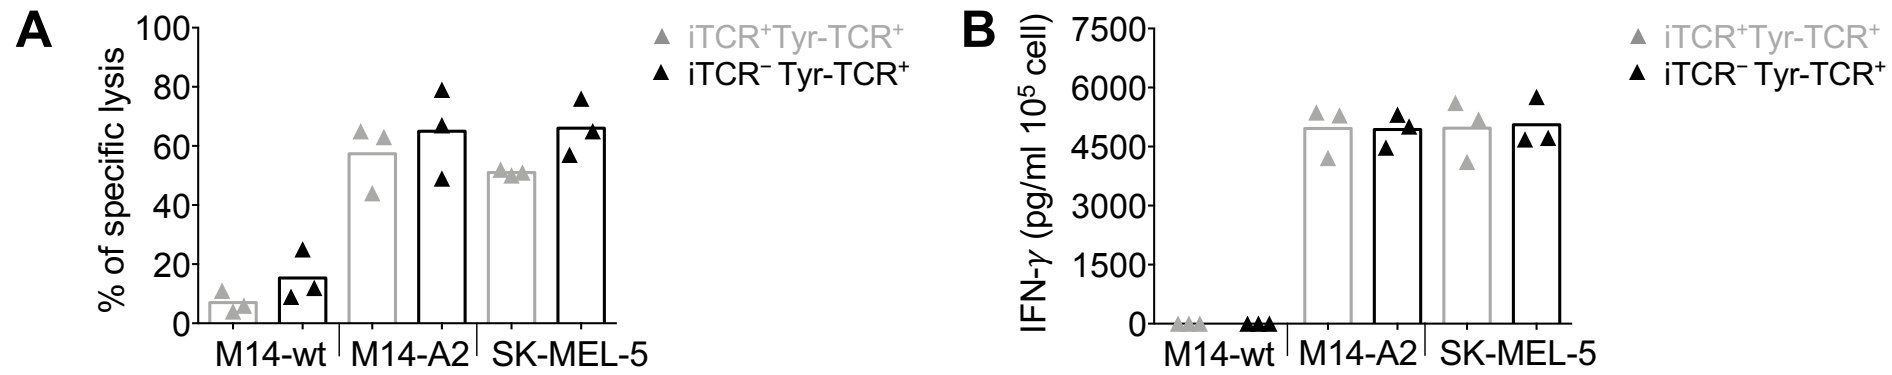

# Figure S4

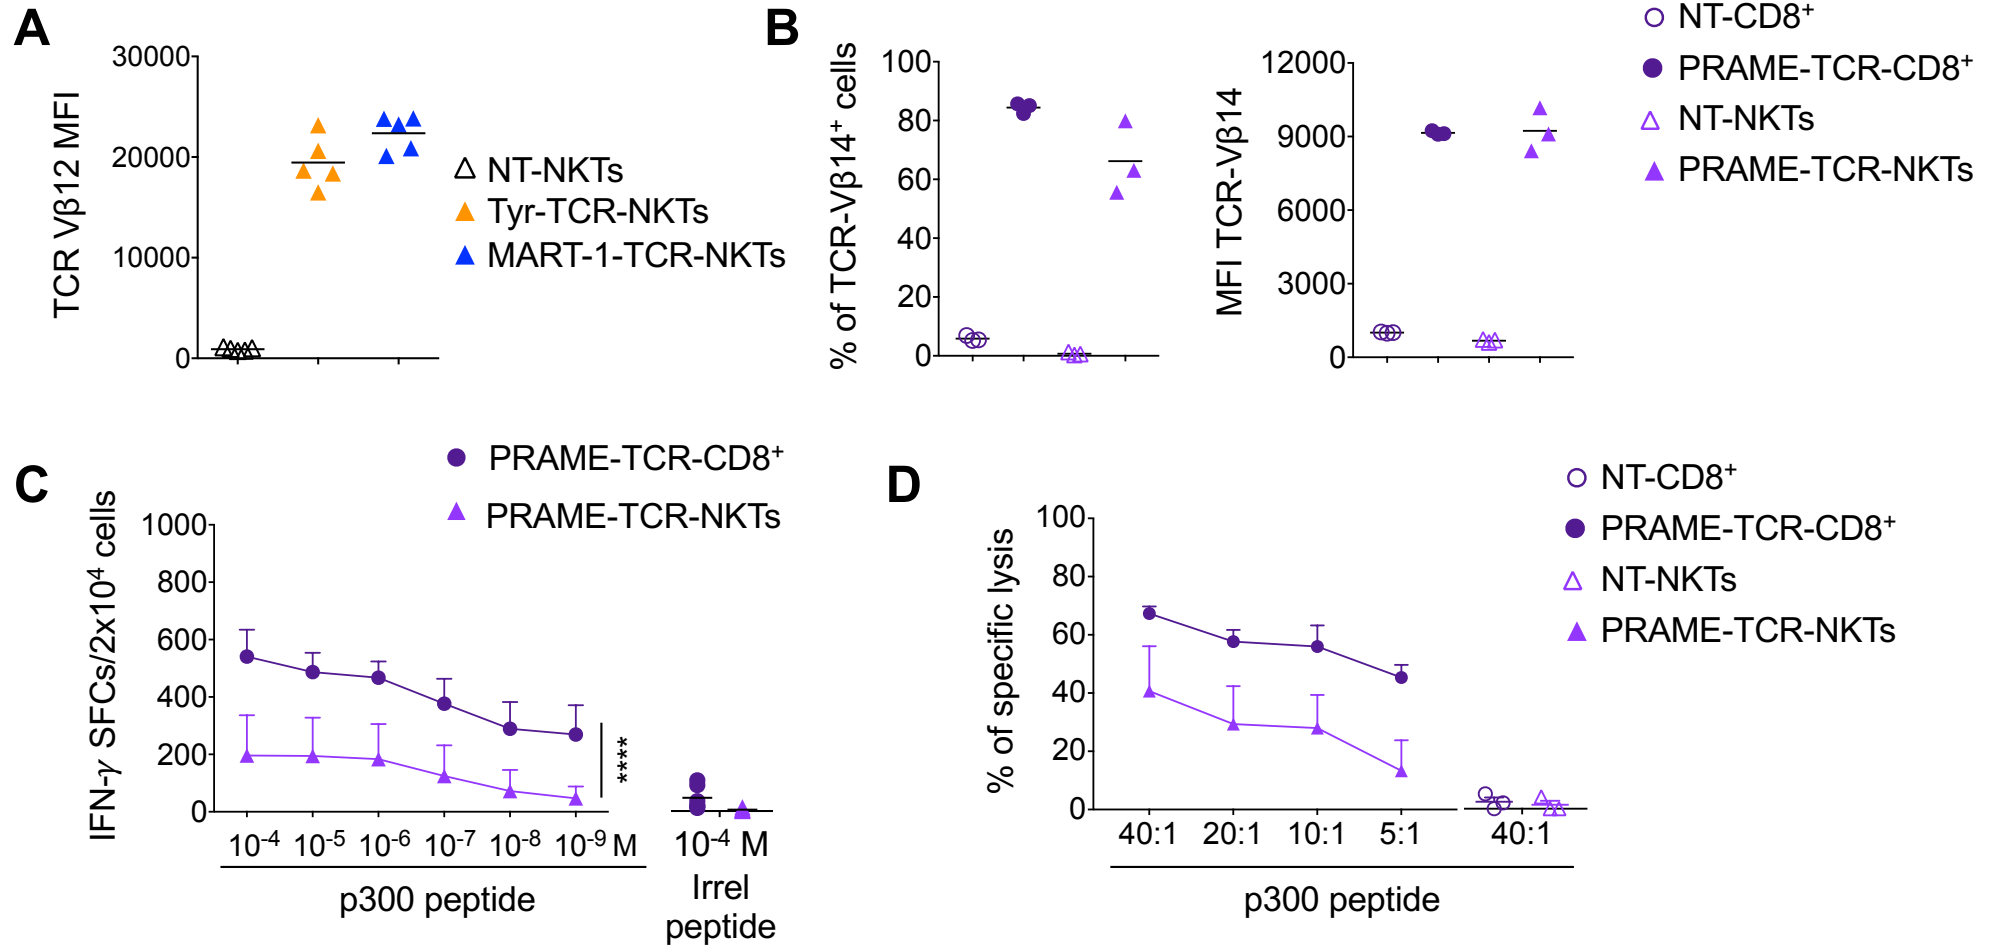



# Figure S5

**A**

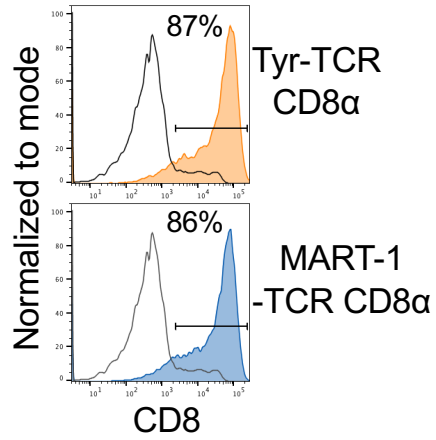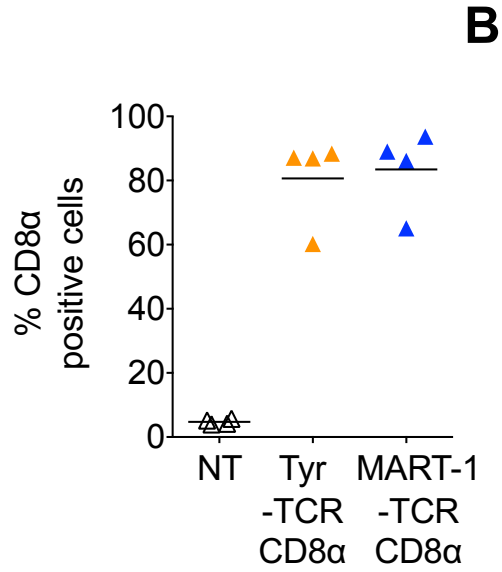

**B**

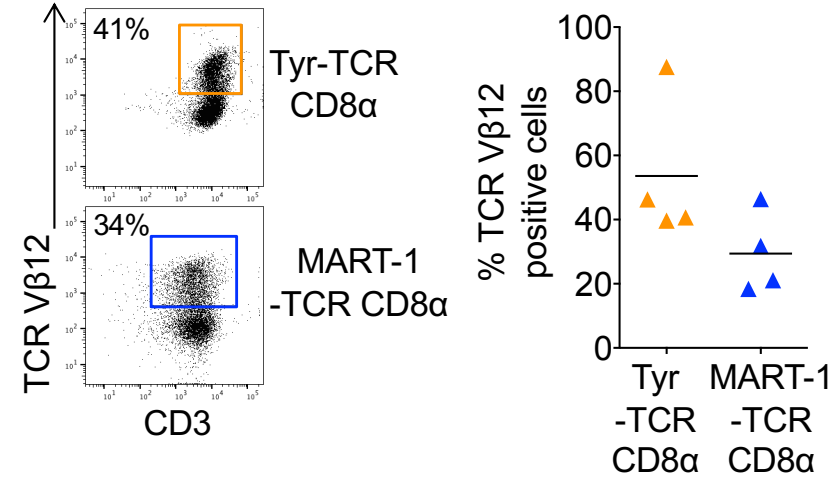

**C**

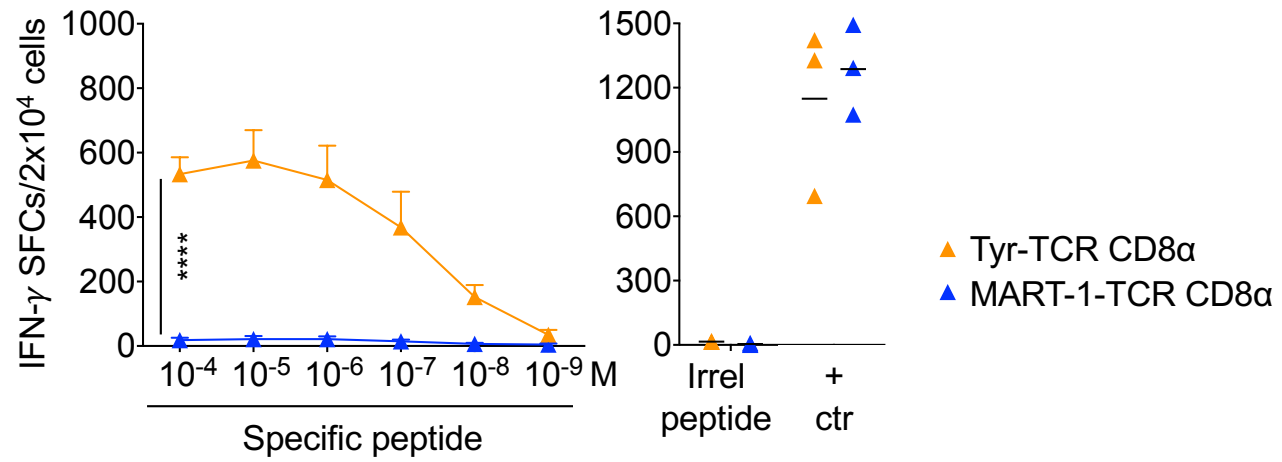

# Figure S6

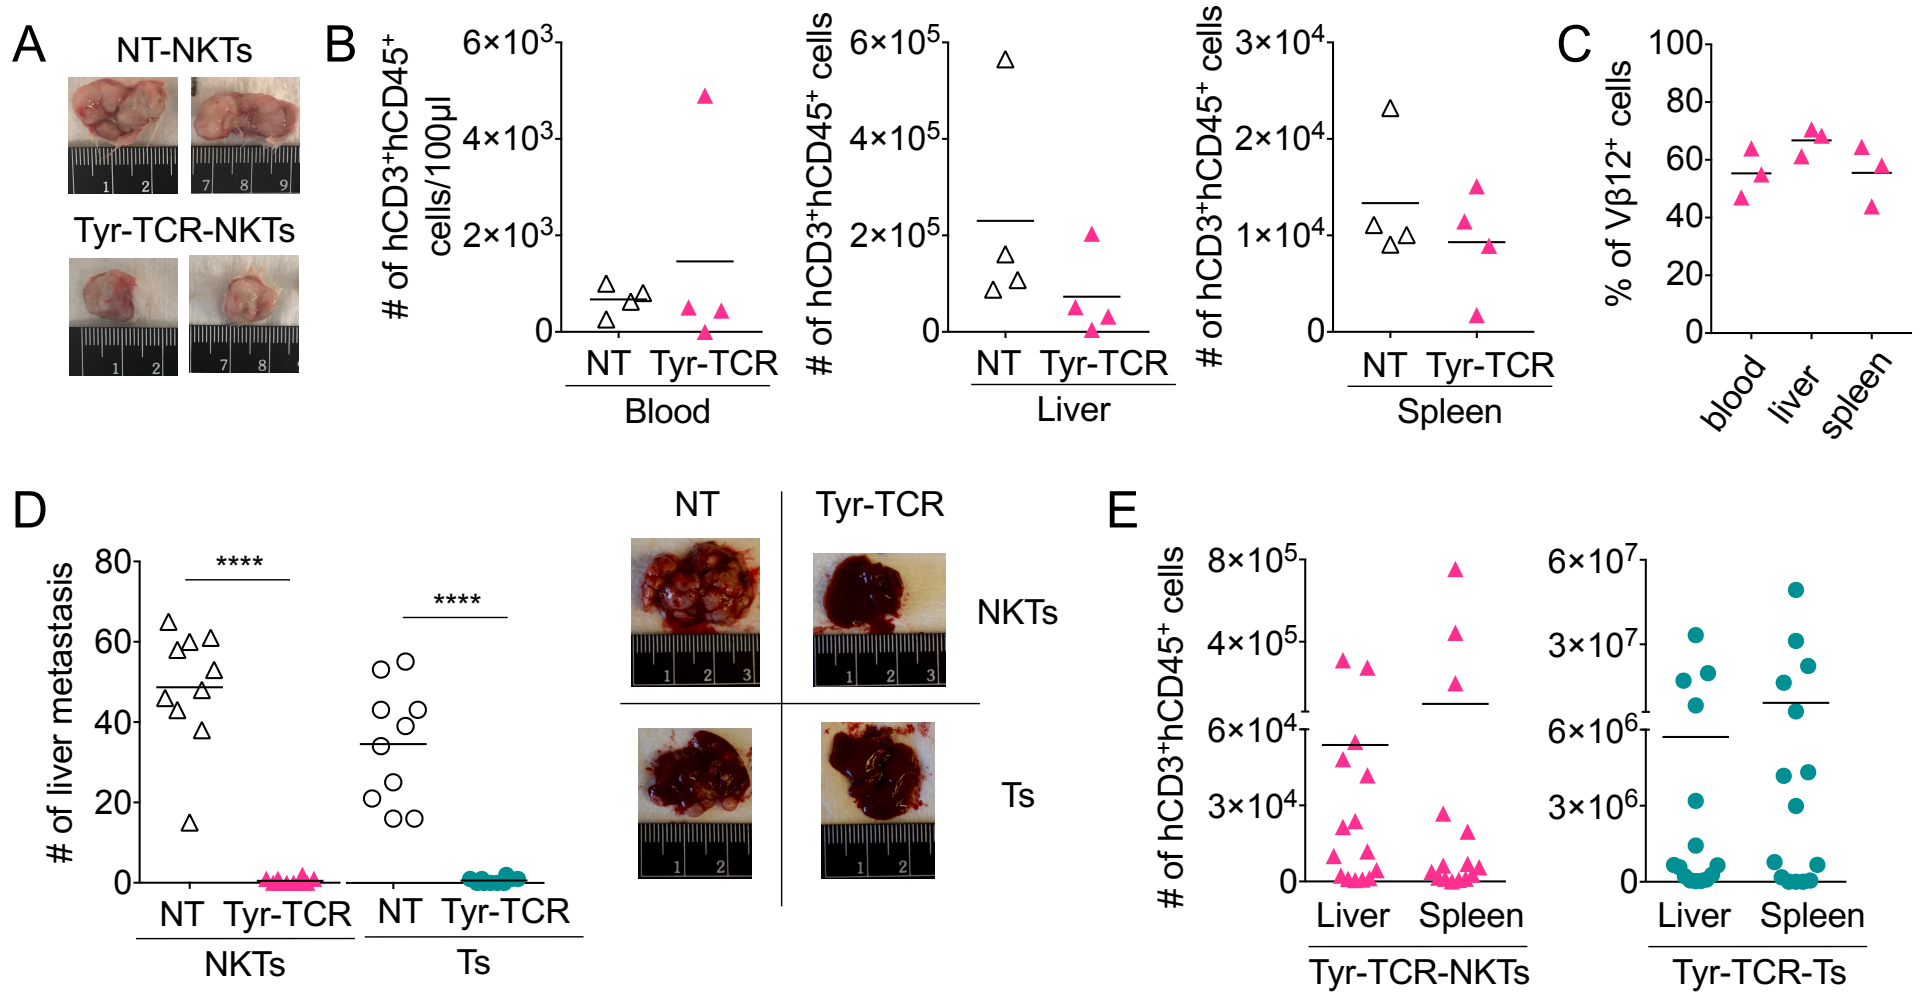

# Figure S7

**A**

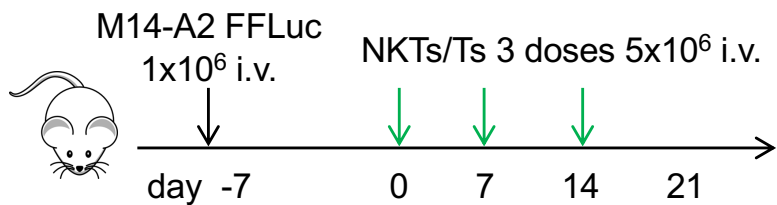

**B**

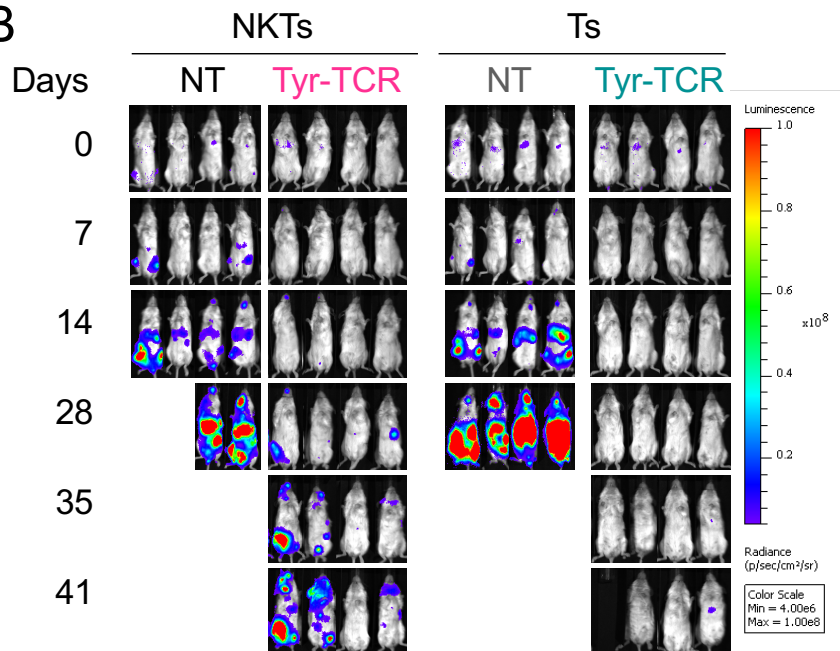

**C**

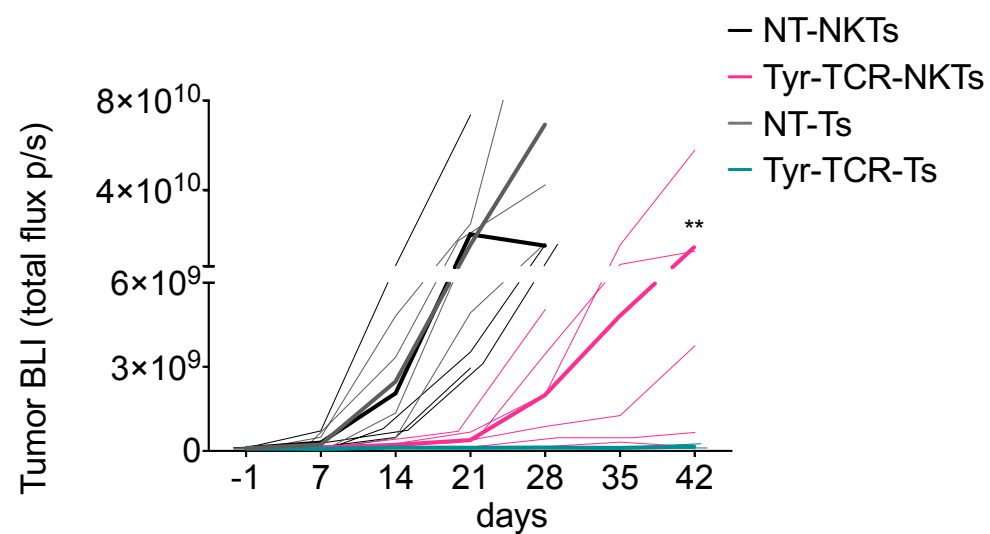

**D**

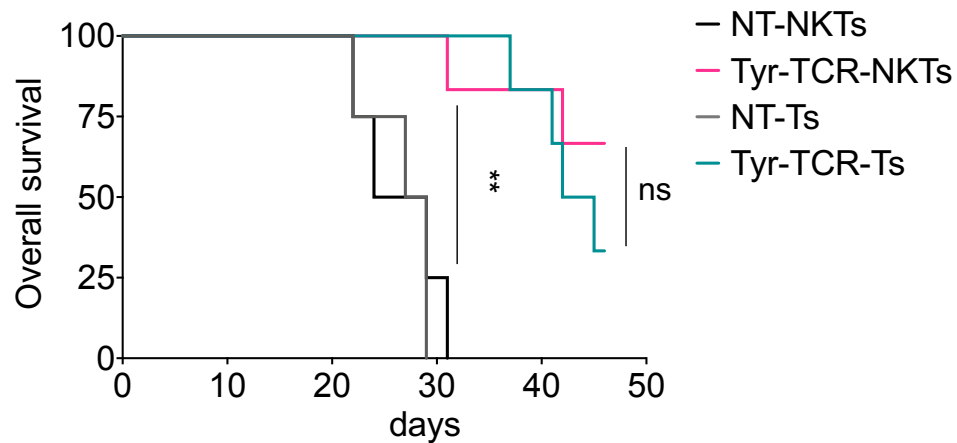

**E**

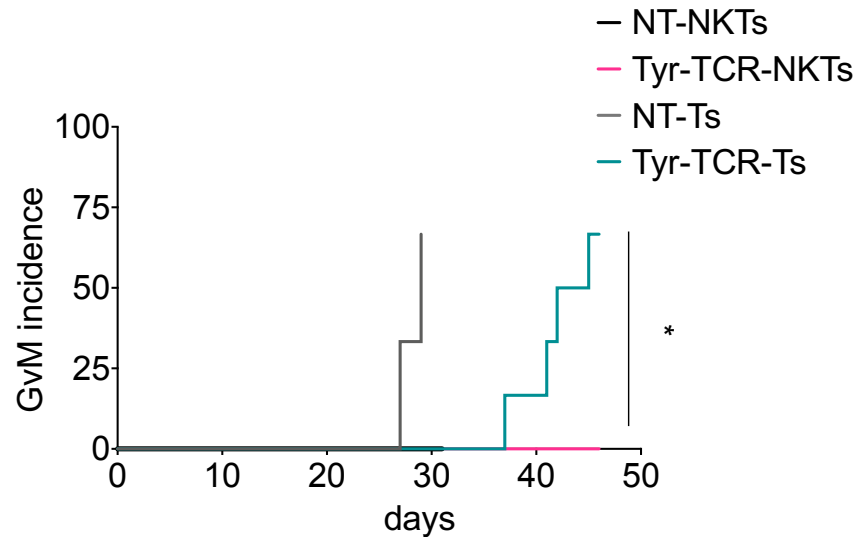

Supplement: NIHMS1641491-supplement-Suppl_Figures.pdf [file NIHMS1641491-supplement-Suppl_Figures.pdf]
